# Supplementary material for: Photocatalytic reduction of Cr(vi) by polyoxometalates/TiO2electrospun nanofiber composites
Source: Royal Society of Chemistry journal article supplement (doi:10.1039/c4ra08934k), 2014-09-10
Supplement: c4ra08934k1.pdf [file c4ra08934k1.pdf]

## **Photocatalytic reduction of Cr (VI) by polyoxometalates-TiO<sub>2</sub> electrospun nanofiber composites**

Duoying Zhang,<sup>a</sup> Xu Li,<sup>a</sup> Huaqiao Tan,<sup>b</sup> Guoqiang Zhang,<sup>bc</sup> Zhao Zhao,<sup>bc</sup> Hongfei Shi,<sup>b</sup> Lingtong Zhang,<sup>b</sup> Weixing Yu,<sup>b</sup> Zaicheng Sun<sup>b\*</sup>

<sup>a</sup> Department of Electronic Engineering, Jinan University, Guanzhou, 510632, P. R. China

<sup>b</sup> State Key Laboratory of Luminescence and Applications, Changchun Institute of Optics, Fine Mechanics and Physics, 3888 East Nanhu Road, Changchun 130033, P. R. China. Email: sunzc@ciomp.ac.cn

<sup>c</sup> University of Chinese Academy of Sciences, Beijing 100000, P. R. China

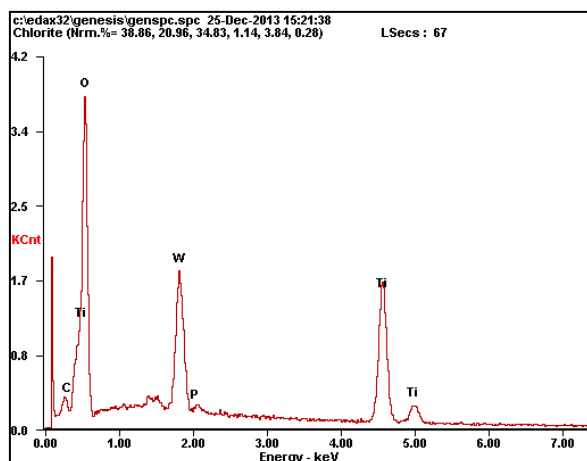

(A)

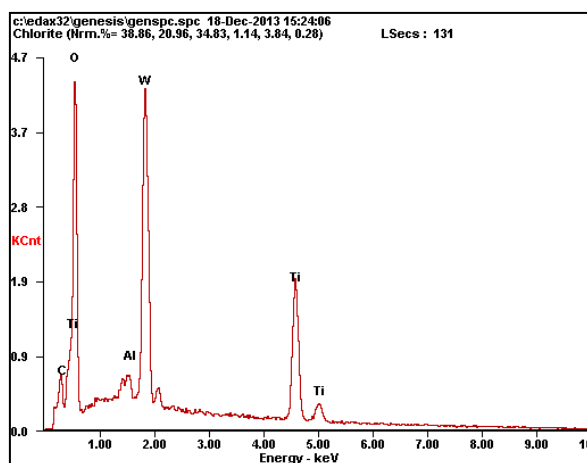

(B)

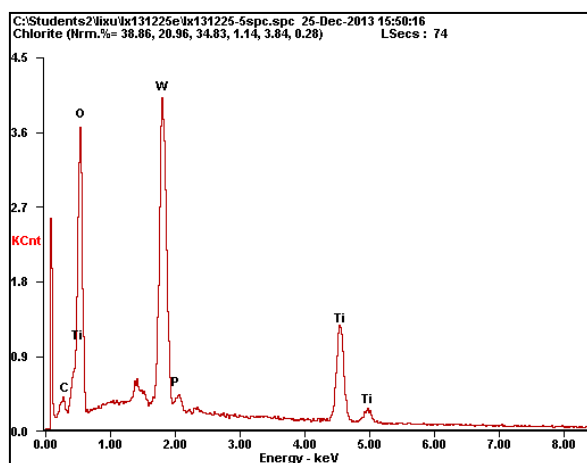

(C)

Figure S1. EDAX spectra of PTA-TiO<sub>2</sub> nanofiber composites with different molar ratio of PTA and Ti(O<sup>i</sup>Pr)<sub>4</sub> (A) 10%, (B) 20%, (C) 30%.

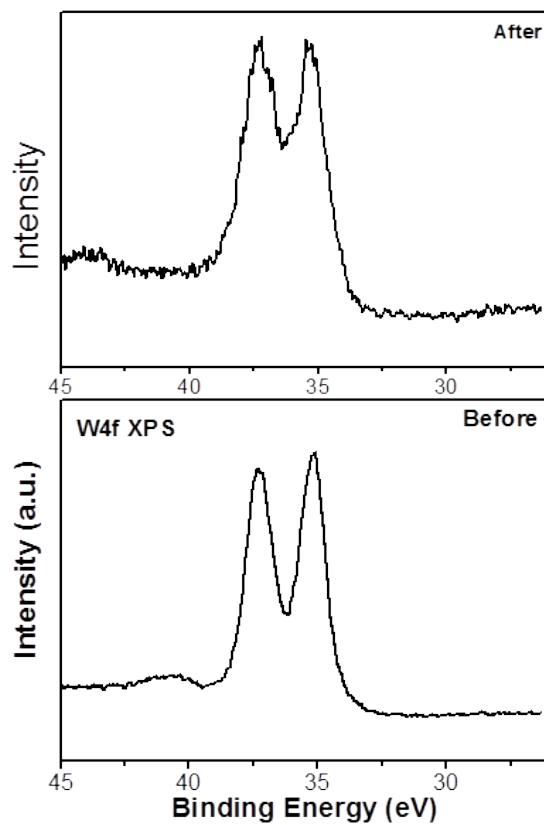

Figure S2. High resolution W 4f XPS spectra of PTA-TiO<sub>2</sub> before and after photoreduction Cr(VI).

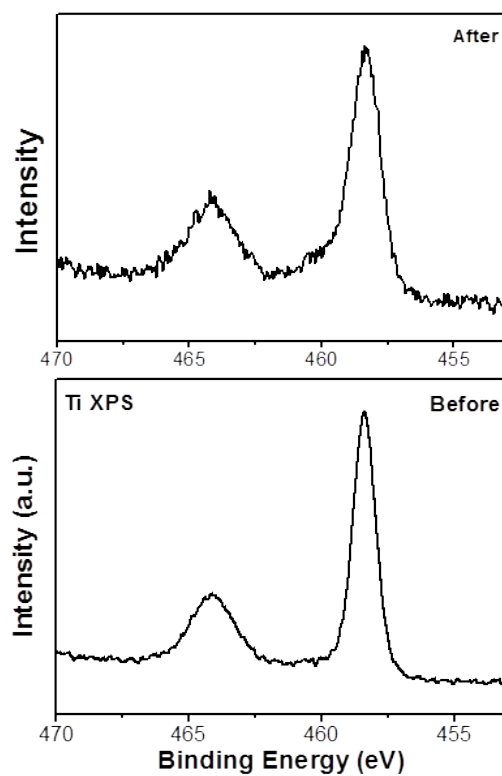

Figure S3. High resolution Ti 2p XPS spectra of PTA-TiO<sub>2</sub> before and after photoreduction Cr(VI).

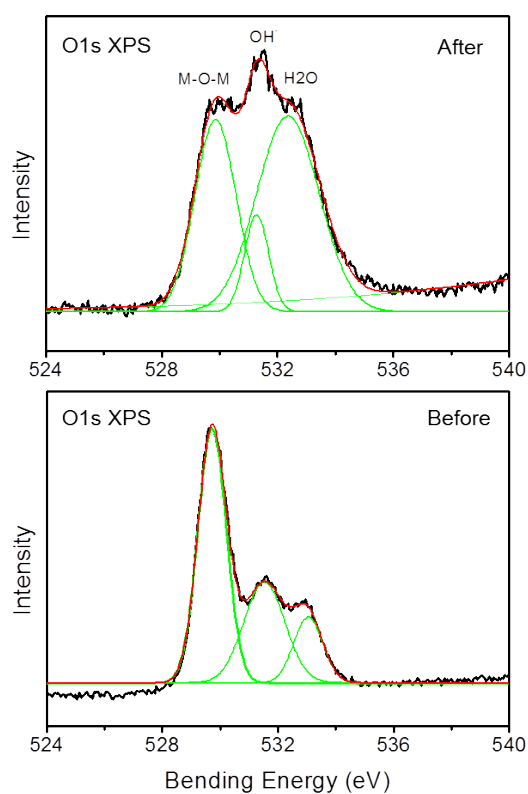

Figure S4. High resolution O 1s XPS spectra of PTA-TiO<sub>2</sub> before and after photoreduction Cr(VI).

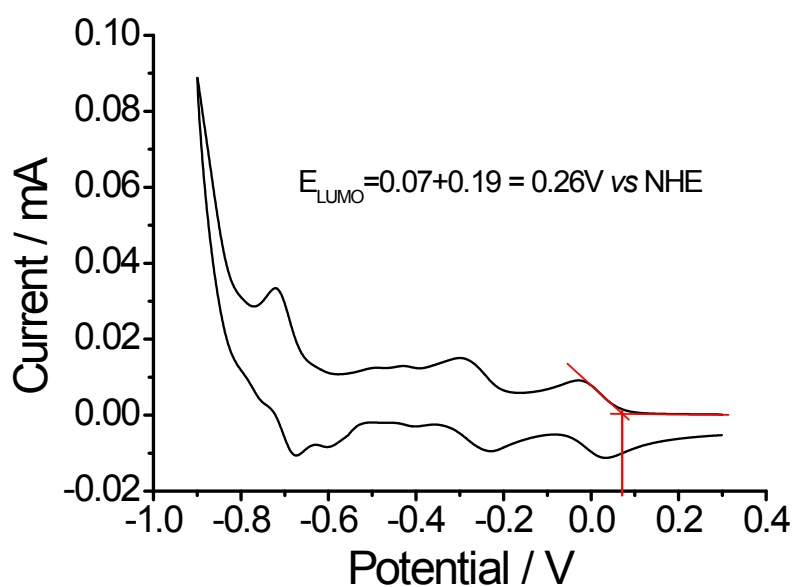

Figure S5. The cyclic voltammetry of H<sub>3</sub>PTA. Three electrodes electrochemical cells (Glass-carbon electrode, Pt and Ag/AgCl as working, counter and reference electrode, electrolyte is 0.1M Na<sub>2</sub>SO<sub>4</sub>/H<sub>2</sub>SO<sub>4</sub> aqueous solution pH=1.5, the H<sub>3</sub>PTA concentration is 10<sup>-3</sup> mol/L)

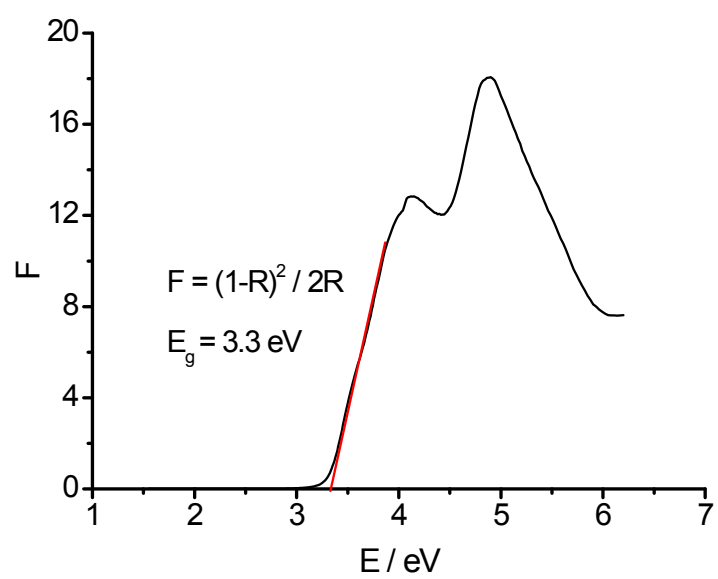

Figure S6. Optical band gap of H<sub>3</sub>PTA
